# Supplementary material
Source: MDPI journal article supplement (https://www.mdpi.com/2077-0472/13/12/2278)
Supplement: s1 [file s1]

Archive with 3 entries (3 files):
- Suppl_Figures_S1_S3.pdf
- Suppl_Table_S1.pdf
- Suppl_Tables_S2_S4.xls
