# Supplementary material
Source: MDPI journal article supplement (https://www.mdpi.com/2077-0472/13/12/2278)
Supplement: s1 [file s1 › Suppl_Tables_S2_S4.xls]

## Sheet: Supp Tab_S2_P.s.
Table S2. Concentration of polar metabolites in cotyledons, embryonic axis, root and, epicotyl of garden pea (Pisum sativum L. cv. Hubal) during seed germination and seedling development. Means (n=3-5) in mg/g DW. Statistically significant differences (p<0.05) are indicated by different letters after one-way ANOVA and Tukey’s post hoc test.
		Germination (days)
		0	1	2	3	4	5	6	7
Organ	Metabolite	mg/g DW
Cotyledons	Total polar metabolites	55.05c	49.07d	89.42a	44.15e	76.27b	74.94b	73.30b	48.66d
	Soluble carbohydrates	49.51c	43.31d	76.15a	35.44e	57.48b	56.88b	48.98c	30.80f
	fructose	0.03de	0.02e	0.05de	0.10bc	0.13ab	0.15a	0.06cd	0.05de
	fructose-6-phosphate	0.03e	0.07b	0.15a	0.05cd	0.05cd	0.06c	0.05cd	0.04de
	galactinol	0.45b	0.43c	0.62a	0.12d	0.05e	0.05e	0.00f	0.00f
	galactonate	0.05e	0.06d	0.10b	0.05de	0.12a	0.12a	0.10b	0.09b
	galactose	0.07d	0.18a	0.17a	0.05e	0.09c	0.12b	0.05ef	0.03f
	gluconate	0.04ab	0.05ab	0.07ab	0.01b	0.03ab	0.03ab	0.06ab	0.08a
	glucose	0.00d	0.18c	0.00d	0.16c	0.31ab	0.41a	0.31b	0.17c
	glucose-6-phosphate	0.00d	0.04c	0.14a	0.08b	0.08b	0.09b	0.09b	0.07b
	myo-inositol	0.91d	0.90d	1.90a	0.99d	1.94a	1.84a	1.73b	1.23c
	raffinose	3.80b	4.14ab	4.34a	0.59c	0.51cd	0.52d	0.21de	0.10e
	ribonic acid	0.15ab	0.07b	0.11ab	0.06b	0.16ab	0.19a	0.13ab	0.09b
	stachyose	14.45b	14.08b	21.75a	2.91c	3.02c	1.82d	0.78d	0.34e
	sucrose	13.48d	14.16d	41.34b	29.15c	49.94a	50.60a	44.40b	28.52c
	verbascose	16.06a	7.62b	5.41c	1.14d	1.38d	1.25d	1.09d	0.00e
	Amino acids	1.14e	1.37e	4.44d	4.20d	10.80c	10.96c	16.06a	11.91b
	alanine	0.03e	0.08e	0.21d	0.19d	0.54b	0.39c	0.70a	0.65a
	asparagine	0.03e	0.03e	0.23cd	0.13de	0.25c	0.30c	0.58a	0.45b
	β-alanine	0.00e	0.00e	0.00e	0.06d	0.20b	0.21b	0.23a	0.15c
	GABA	0.02f	0.07ef	0.11e	0.07ef	1.26c	0.78d	1.57b	1.85a
	glutamate	0.46f	0.44f	1.62b	1.08d	1.33c	1.68b	1.90a	0.82e
	glutamine	0.10e	0.13e	0.20de	0.30d	0.60bc	0.63b	0.91a	0.49c
	glycine	0.06d	0.03e	0.25a	0.11b	0.11b	0.11b	0.12b	0.08c
	homoserine	0.10e	0.03e	0.10e	0.51d	2.49c	2.91b	4.44a	3.07b
	hydroxyproline	0.12bc	0.10c	0.22a	0.12bc	0.13bc	0.15b	0.08c	0.25a
	isoleucine	0.03f	0.04f	0.11d	0.09e	0.20b	0.18c	0.23a	0.21b
	leucine	0.07e	0.10de	0.30a	0.12cd	0.25b	0.23b	0.23b	0.14c
	lysine	0.00f	0.07e	0.07e	0.14d	0.36c	0.35c	0.69a	0.59b
	phenylalanine	0.02e	0.02e	0.07d	0.06d	0.20c	0.21c	0.35a	0.31b
	proline	0.01g	0.05e	0.15d	0.17d	0.45c	0.47bc	0.68a	0.49b
	serine	0.04f	0.09f	0.44e	0.74d	1.80b	1.75bc	2.48a	1.62c
	threonine	0.03e	0.05e	0.23b	0.10d	0.20c	0.19c	0.27a	0.28a
	valine	0.02d	0.03d	0.14c	0.19c	0.44b	0.42b	0.60a	0.45b
	Organic acids	3.22e	3.33de	7.51a	3.59d	5.51b	4.87c	5.32b	3.19e
	acetate	0.10c	0.10c	0.27ab	0.12c	0.32a	0.23b	0.23b	0.15c
	citrate	2.65e	2.55e	5.92a	2.91d	3.82b	3.63c	3.66bc	1.52f
	fumarate	0.05e	0.06de	0.13a	0.05e	0.12b	0.10bc	0.08cd	0.07de
	lactate	0.04c	0.04c	0.09c	0.08c	0.26b	0.11c	0.33b	0.49a
	malate	0.24e	0.41bc	0.87a	0.26de	0.43b	0.39c	0.30d	0.24e
	oxalate	0.00d	0.00d	0.00d	0.00d	0.05b	0.02c	0.05b	0.06a
	propanoic acid	0.00c	0.00c	0.00c	0.00c	0.06a	0.06a	0.07a	0.06 a
	succinate	0.11e	0.15de	0.23cd	0.14de	0.40b	0.29c	0.58a	0.58a
	2.3.4- trihydroksybutyrate	0.03d	0.01f	0.01f	0.02de	0.05a	0.04b	0.03c	0.02e
	Remaining compound (phosphate)	1.18ef	1.07f	1.30e	0.91g	2.48c	2.23d	2.94a	2.75b
Embryonic axis	Total polar metabolites	202.19a	188.67b	137.42c	-	-	-	-	-
	Soluble carbohydrates	185.39a	172.19b	107.58c	-	-	-	-	-
	fructose	0.00b	0.00b	3.34a	-	-	-	-	-
	fructose-6-phosphate	0.01b	0.02b	0.04a	-	-	-	-	-
	galactinol	2.59b	2.97a	1.04c	-	-	-	-	-
	galactonate	0.38a	0.34b	0.37a	-	-	-	-	-
	galactose	0.32b	0.43b	0.63a	-	-	-	-	-
	gluconate	0.65a	0.48b	0.19c	-	-	-	-	-
	glucose	0.00b	0.00b	5.30a	-	-	-	-	-
	glucose-6-phosphate	0.00b	0.17b	0.65a	-	-	-	-	-
	2-keto-D-gluconate	0.00b	0.00b	0.68a	-	-	-	-	-
	myo-inositol	4.87b	4.21c	6.84a	-	-	-	-	-
	raffinose	28.62a	20.99b	3.59c	-	-	-	-	-
	ribonic acid	0.18b	0.18b	0.32a	-	-	-	-	-
	stachyose	75.37a	68.72a	10.27b	-	-	-	-	-
	sucrose	42.44c	49.90b	71.32a	-	-	-	-	-
	verbascose	30.95a	24.56b	3.51c	-	-	-	-	-
	Amino acids	4.32c	6.11b	19.73a	-	-	-	-	-
	alanine	0.45c	0.78b	2.44a	-	-	-	-	-
	asparagine	0.25b	0.27b	0.97a	-	-	-	-	-
	β-alanine	0.00b	0.00b	0.16a	-	-	-	-	-
	GABA	0.09b	0.31a	0.32a	-	-	-	-	-
	glutamate	1.58b	1.29c	3.62a	-	-	-	-	-
	glutamine	0.19c	0.45b	1.29a	-	-	-	-	-
	glycine	0.22b	0.18b	0.37a	-	-	-	-	-
	homoserine	0.03b	0.04b	0.45a	-	-	-	-	-
	hydroxyproline	0.81b	0.85b	2.61a	-	-	-	-	-
	isoleucine	0.00c	0.16b	0.39a	-	-	-	-	-
	leucine	0.32c	0.56b	0.98a	-	-	-	-	-
	lysine	0.00b	0.00b	1.02a	-	-	-	-	-
	phenylalanine	0.05c	0.08b	0.14a	-	-	-	-	-
	proline	0.14c	0.22b	0.56a	-	-	-	-	-
	serine	0.05c	0.45b	1.86a	-	-	-	-	-
	threonine	0.00c	0.23b	1.35a	-	-	-	-	-
	tyrosine	0.00b	0.00b	0.55a	-	-	-	-	-
	valine	0.08b	0.16b	0.53a	-	-	-	-	-
	Organic acids	6.65a	6.32b	6.12b	-	-	-	-	-
	acetate	0.24b	0.24b	0.36a	-	-	-	-	-
	citrate	5.05a	4.37b	3.62c	-	-	-	-	-
	fumarate	0.09c	0.11b	0.15a	-	-	-	-	-
	2-keto-D-glutarate	0.06a	0.04b	0.07a	-	-	-	-	-
	lactate	0.15b	0.29a	0.11c	-	-	-	-	-
	malate	0.36c	0.80b	1.28a	-	-	-	-	-
	succinate	0.68a	0.46b	0.46b	-	-	-	-	-
	2.3.4- trihydroksybutyrate	0.03b	0.02c	0.07a	-	-	-	-	-
	Remaining compound (phosphate)	4.84a	3.27c	3.49b	-	-	-	-	-
Root	Total polar metabolites	-	-	-	157.47b	171.26a	153.85b	157.63b	160.16ab
	Soluble carbohydrates	-	-	-	80.29a	73.89a	53.69b	47.10bc	39.78c
	fructose	-	-	-	10.66a	4.96b	1.89c	0.93c	0.67c
	fructose-6-phosphate	-	-	-	0.52a	0.50a	0.43b	0.00c	0.00c
	galactonate	-	-	-	0.49a	0.38b	0.35b	0.34b	0.27c
	galactose	-	-	-	7.47b	8.51a	7.27b	6.54c	4.75d
	gluconate	-	-	-	0.23a	0.00b	0.00b	0.00b	0.00b
	glucose	-	-	-	27.06a	30.18a	20.26b	17.98b	12.02c
	glucose-6-phosphate	-	-	-	0.97a	0.70b	0.68b	0.48c	0.38d
	2-keto-D-gluconate	-	-	-	3.83a	2.37b	1.05c	0.64c	0.55c
	myo-inositol	-	-	-	5.09a	3.25b	2.72c	2.42d	2.13e
	ribonic acid	-	-	-	0.70a	0.64ab	0.64b	0.57c	0.54c
	sucrose	-	-	-	23.80a	22.68a	18.61b	17.39b	18.65b
	Amino acids	-	-	-	41.53e	65.24d	72.09c	84.18b	94.99a
	alanine	-	-	-	2.09a	1.49b	1.12c	1.07c	1.47b
	asparagine	-	-	-	4.06d	5.11c	5.21c	5.84b	7.58a
	aspartate	-	-	-	0.14a	0.10a	0.07a	0.06a	0.06a
	β-alanine	-	-	-	0.37ab	0.46a	0.37ab	0.29bc	0.23c
	GABA	-	-	-	0.93bc	0.95b	0.80d	0.86cd	1.05a
	glutamate	-	-	-	2.80a	1.82b	1.38c	1.21d	1.32c
	glutamine	-	-	-	2.49a	2.22b	1.81c	1.80c	1.69c
	glycine	-	-	-	1.76bc	1.20c	1.60d	2.05ab	2.17a
	homoserine	-	-	-	21.12e	45.34d	52.89c	64.04b	72.40a
	hydroxyproline	-	-	-	2.50a	2.04b	1.88b	1.93b	1.89b
	isoleucine	-	-	-	0.68a	0.53b	0.45c	0.40cd	0.34d
	leucine	-	-	-	0.76a	0.65b	0.59bc	0.55c	0.59bc
	lysine	-	-	-	1.08b	1.45a	1.25ab	1.11b	1.41a
	phenylalanine	-	-	-	0.35c	0.43b	0.40b	0.45ab	0.49a
	proline	-	-	-	2.29a	1.15b	1.06b	0.74c	0.56c
	serine	-	-	-	3.23a	2.92b	2.50c	2.46c	2.44c
	threonine	-	-	-	1.48d	1.81c	1.96c	2.15b	2.37a
	valine	-	-	-	1.13a	1.43a	1.23a	1.26a	1.36a
	Organic acids	-	-	-	19.58a	16.78b	13.45c	12.08d	10.52e
	acetate	-	-	-	0.17b	0.37a	0.42a	0.38a	0.36a
	butanoic acid	-	-	-	0.00d	0.13c	0.20b	0.28a	0.28a
	citrate	-	-	-	12.05a	9.22b	6.80c	5.44d	4.80e
	fumarate	-	-	-	0.32a	0.22bc	0.25b	0.26b	0.21c
	2-keto-D-glutarate	-	-	-	0.00	0.00	0.00	0.00	0.00
	lactate	-	-	-	0.09d	0.22a	0.21ab	0.15c	0.19b
	malate	-	-	-	5.18a	4.97a	3.90b	3.88b	3.11c
	oxalate	-	-	-	0.05c	0.07ab	0.08a	0.07ab	0.06bc
	propanoic acid	-	-	-	0.31c	0.42b	0.47ab	0.53a	0.49ab
	succinate	-	-	-	0.52a	0.40b	0.39b	0.38b	0.40b
	2.3.4- trihydroksybutyrate	-	-	-	0.40a	0.37a	0.38a	0.36a	0.35a
	Remaining compounds	-	-	-	8.30c	9.61b	10.29ab	10.32ab	10.53a
	phosphate	-	-	-	8.25c	9.50b	10.18ab	10.20ab	10.38a
	urea	-	-	-	0.05c	0.11b	0.11b	0.12b	0.14a
Epicotyl	Total polar metabolites				132.05d	166.21c	162.71c	185.50b	201.03a
	Soluble carbohydrates	-	-	-	73.19b	79.92a	65.90c	73.82b	79.19a
	fructose	-	-	-	7.19a	4.11b	2.31d	2.91c	3.82b
	fructose-6-phosphate	-	-	-	0.39b	0.43a	0.37b	0.38b	0.43a
	galactonate	-	-	-	0.36ab	0.39a	0.36ab	0.34b	0.32b
	galactose	-	-	-	3.51e	4.28 d	4.68c	7.17b	8.70 a
	gluconate	-	-	-	0.06b	0.10a	0.00c	0.00c	0.00c
	glucose	-	-	-	19.20d	24.88c	23.46c	29.83b	36.02a
	glucose-6-phosphate	-	-	-	0.57b	0.93a	0.58b	0.61b	0.57b
	2-keto-D-gluconate	-	-	-	2.80a	1.63b	1.13b	1.12b	1.24b
	maltose	-	-	-	0.00c	0.38a	0.30b	0.00c	0.00c
	myo-inositol	-	-	-	5.20a	4.35b	3.82c	3.65d	3.38e
	raffinose	-	-	-	0.11a	0.00b	0.00b	0.00b	0.00b
	ribonic acid	-	-	-	0.60b	0.68a	0.63ab	0.61b	0.61b
	sucrose	-	-	-	33.20b	37.75a	28.26 c	27.23c	24.09d
	Amino acids	-	-	-	39.49e	64.02d	74.67c	87.61b	97.91a
	alanine	-	-	-	2.08a	1.50b	1.14bc	0.97c	1.00bc
	asparagine	-	-	-	2.72e	3.41d	4.45c	7.64b	11.15a
	aspartate	-	-	-	0.06b	0.00c	0.00c	0.09a	0.09a
	β-alanine	-	-	-	0.32c	0.43a	0.35b	0.30d	0.25e
	GABA	-	-	-	1.12b	1.12 b	1.02bc	0.98c	1.40a
	glutamate	-	-	-	3.13a	2.72b	2.17c	1.97d	1.84d
	glutamine	-	-	-	3.19c	2.64d	2.45d	3.42b	3.78a
	glycine	-	-	-	0.75e	1.17d	1.67c	2.10b	3.22a
	homoserine	-	-	-	13.09e	37.27d	47.46c	53.82b	56.95a
	hydroxyproline	-	-	-	2.65a	2.60ab	2.24c	2.47b	2.67a
	isoleucine	-	-	-	0.63a	0.54b	0.50b	0.65a	0.68a
	leucine	-	-	-	0.90a	0.75bc	0.64d	0.68cd	0.80b
	lysine	-	-	-	1.48b	1.07c	0.99c	1.65ab	1.86a
	phenylalanine	-	-	-	0.39d	0.37e	0.54c	1.03b	1.35a
	proline	-	-	-	1.79a	1.23c	1.38b	1.14d	0.91e
	serine	-	-	-	2.46d	2.69c	2.73c	3.44b	4.18a
	threonine	-	-	-	1.56d	3.09c	3.62b	3.65b	3.84a
	valine	-	-	-	1.16c	1.42bc	1.29c	1.61ab	1.92a
	Organic acids	-	-	-	12.39c	14.07a	12.98b	12.88bc	11.60d
	acetate	-	-	-	0.25c	0.31a	0.31a	0.29ab	0.26bc
	citrate	-	-	-	7.92b	8.96a	8.01b	7.83b	6.41c
	fumarate	-	-	-	0.21ab	0.23a	0.24a	0.17b	0.22ab
	lactate	-	-	-	0.11b	0.15a	0.12b	0.08c	0.07d
	malate	-	-	-	2.32bc	2.32cd	2.22d	2.43ab	2.54a
	oxalate	-	-	-	0.03b	0.03b	0.03b	0.07a	0.06ab
	propanoic acid	-	-	-	0.25c	0.45b	0.45b	0.47b	0.57a
	succinate	-	-	-	0.54ab	0.53b	0.52b	0.53b	0.56a
	2.3.4- trihydroksybutyrate	-	-	-	0.40c	0.58a	0.51b	0.48b	0.37c
	Reamining compounds	-	-	-	7.33e	8.71d	9.73c	11.74b	12.87a
	phosphate	-	-	-	7.24e	8.64d	9.65c	11.62b	12.75a
	urea	-	-	-	0.10a	0.07a	0.07a	0.12a	0.12a

## Sheet: Supp Tab_S3_C.s.
Table S3. Concentration of polar metabolites in cotyledons, embryonic axis, roots, and hypocotyl of cucumber (Cucumis sativum L. cv. Polan F1) during seed gemination and seedling development. Means (n=3-5) in mg/g DW. Statistically significant differences (P<0.05) are indicated by different letters after one-way ANOVA and Tukey’s post hoc test.
		Germination (days)
		0	1	2	3	4	5	6	7
Organ	Metabolite	mg/g DW
Cotyledons	Total polar metabolites	23.35cd	23.70cd	21.93cd	18.52d	25.70c	31.70b	46.92a	46.86a
	Soluble carbohydrates	21.01a	20.90a	17.50b	10.52c	9.92c	11.61c	18.55ab	17.70b
	fructose	0.03e	0.07de	0.21cde	0.68b	0.29cd	0.44c	1.08a	1.03a
	fructose-6-phosphate	0.00e	0.12e	0.08e	0.09e	0.35d	0.55c	1.46a	1.15b
	galactinol	0.17b	0.20b	0.13b	0.19b	0.76a	0.73a	0.74a	0.80a
	galactose	0.01d	0.02d	0.03d	0.07c	0.12a	0.09b	0.11a	0.12a
	glucose	0.06c	0.13c	0.34b	0.13c	0.47a	0.55a	0.51a	0.56a
	glucose-6-phosphate	0.00e	0.05e	0.06de	0.13d	0.40b	0.33c	0.61a	0.44b
	2-keto-D-gluconate	0.00d	0.00d	0.00d	0.06d	0.25c	0.43b	0.41b	0.55a
	myo-inositol	0.16e	0.26de	0.39d	0.61c	0.98b	1.03b	1.49a	1.42a
	raffinose	5.60a	0.52b	0.40b	0.32b	0.33b	0.33b	0.47b	0.43b
	ribonic acid	0.00c	0.01bc	0.02bc	0.02bc	0.03b	0.03b	0.06a	0.06a
	stachyose	6.60b	7.60a	3.62c	0.50d	0.68d	0.61d	0.62d	0.58d
	sucrose	8.39b	11.93a	12.24a	7.73b	5.26c	6.49bc	10.98a	10.56a
	Amino acids	0.64e	0.62e	1.60e	6.28d	12.89c	16.06b	24.02a	24.36a
	alanine	0.02e	0.03e	0.11de	0.19cd	0.28c	0.40b	0.51a	0.48ab
	asparagine	0.01d	0.00d	0.03cd	0.05c	0.17b	0.21a	0.20ab	0.21a
	β-alanine	0.03a	0.03a	0.04a	0.00c	0.00c	0.01b	0.00c	0.01b
	GABA	0.03e	0.01e	0.05de	0.19a	0.06de	0.10cd	0.17ab	0.13bc
	glutamate	0.17de	0.10e	0.31d	0.50c	0.99a	0.88ab	0.93ab	0.81b
	glutamine	0.04c	0.03c	0.09c	0.25c	0.92b	1.00b	1.39a	1.07b
	glycine	0.01d	0.02cd	0.03bc	0.03bc	0.05a	0.05a	0.04b	0.05a
	hydroxyproline	0.12d	0.08d	0.19cd	0.36c	0.64b	0.62b	0.94a	1.06a
	isoleucine	0.01c	0.01c	0.02c	0.08c	0.28b	0.35ab	0.37ab	0.44a
	leucine	0.09e	0.20de	0.28de	0.33d	0.42c	0.60b	0.66ab	0.79a
	phenylalanine	0.03d	0.03d	0.07cd	0.14c	0.48b	0.57a	0.61a	0.59a
	proline	0.00e	0.02e	0.05de	0.16de	0.51d	0.59bc	0.65ab	0.73a
	serine	0.05f	0.04f	0.24e	0.19e	0.50d	0.78c	0.96b	1.35a
	threonine	0.02f	0.02f	0.07ef	0.15e	0.59d	0.78c	1.10b	1.26a
	valine	0.00f	0.00f	0.03ef	0.07e	0.32d	0.42c	0.48b	0.54a
	Organic acids	0.72e	1.34e	1.69de	2.44d	4.78c	5.84b	8.61a	9.04a
	citrate	0.24d	0.28d	0.58cd	0.81c	1.38b	1.51b	1.90a	1.91a
	lactate	0.10bc	0.13b	0.10bc	0.20a	0.08bc	0.06c	0.12b	0.08bc
	malate	0.18e	0.54de	0.52de	0.82d	2.37c	3.19b	5.14a	5.34a
	oxalate	0.18bc	0.32ab	0.37a	0.34a	0.26abc	0.24abc	0.20bc	0.17c
	rythronic acid	0.00d	0.00d	0.00d	0.07c	0.08c	0.09c	0.16b	0.19a
	succinate	0.02e	0.06e	0.12e	0.20d	0.61c	0.74c	1.09b	1.34a
	Remaining compound (phosphate)	0.97e	0.82e	1.11e	2.87d	4.77c	6.90b	10.77a	10.57a
Embryonic axis	Total polar metabolites	52.22b	37.82c	98.88a	-	-	-	-	-
	Soluble carbohydrates	48.00b	31.43c	58.81a	-	-	-	-	-
	fructose	0.06a	0.20b	16.94a	-	-	-	-	-
	fructose-6-phosphate	0.00c	0.10b	0.69a	-	-	-	-	-
	galactinol	0.60a	0.28b	0.03c	-	-	-	-	-
	galactose	0.02b	0.03b	1.58a	-	-	-	-	-
	glucose	0.08b	0.31b	17.35a	-	-	-	-	-
	glucose-6-phosphate	0.00c	0.16b	1.27a	-	-	-	-	-
	2-keto-D-gluconate	0.00b	0.00b	3.35a	-	-	-	-	-
	myo-inositol	0.40c	0.81b	6.53a	-	-	-	-	-
	raffinose	11.51a	0.42b	0.12b	-	-	-	-	-
	stachyose	16.14a	4.66b	0.08c	-	-	-	-	-
	sucrose	19.17b	24.45a	10.87c	-	-	-	-	-
	Amino acids	1.26c	3.00b	12.68a	-	-	-	-	-
	alanine	0.04c	0.35b	1.85a	-	-	-	-	-
	asparagine	0.00c	0.07b	0.40a	-	-	-	-	-
	β-alanine	0.06a	0.04b	0.00c	-	-	-	-	-
	GABA	0.07b	0.09b	0.24a	-	-	-	-	-
	glutamate	0.30c	0.74b	2.17a	-	-	-	-	-
	glutamine	0.10b	0.12b	0.96a	-	-	-	-	-
	glycine	0.04b	0.06b	0.20a	-	-	-	-	-
	hydroxyproline	0.21b	0.28b	1.94a	-	-	-	-	-
	isoleucine	0.02b	0.09b	0.27a	-	-	-	-	-
	leucine	0.24b	0.42b	1.31a	-	-	-	-	-
	phenylalanine	0.03c	0.14b	0.54a	-	-	-	-	-
	proline	0.00c	0.12b	0.45a	-	-	-	-	-
	serine	0.11c	0.23b	1.58a	-	-	-	-	-
	threonine	0.03c	0.17b	0.62a	-	-	-	-	-
	valine	0.01c	0.07b	0.17a	-	-	-	-	-
	Organic acids	1.20b	1.99b	17.98a	-	-	-	-	-
	citrate	0.40b	0.53b	5.66a	-	-	-	-	-
	lactate	0.17a	0.16a	0.22a	-	-	-	-	-
	malate	0.13c	0.71b	10.01a	-	-	-	-	-
	oxalate	0.44a	0.41a	0.38a	-	-	-	-	-
	rythronic acid	0.03b	0.01c	0.08a	-	-	-	-	-
	succinate	0.03c	0.17b	1.63a	-	-	-	-	-
	Remaining compound (phosphate)	1.76b	1.38b	9.19a	-	-	-	-	-
Roots	Total polar metabolites	-	-	-	183.15b*	175.92b	221.25a	225.22a	177.78b
	Soluble carbohydrates	-	-	-	104.22c*	82.33c	153.26ab	162.04a	130.53b
	fructose	-	-	-	32.79c*	15.79d	42.74ab	47.85a	39.30bc
	fructose-6-phosphate	-	-	-	0.82b*	0.00c	1.06a	1.05a	0.77b
	galactinol	-	-	-	0.11b*	0.16a	0.18a	0.17a	0.13a
	galactonate	-	-	-	0.00c*	0.39a	0.00c	0.00c	0.04b
	galactose	-	-	-	4.17c*	15.32a	10.26b	10.63b	7.94b
	glucose	-	-	-	43.22c*	20.33d	63.83ab	69.61a	56.79b
	glucose-6-phosphate	-	-	-	2.05a*	1.03 b	1.96a	1.84a	1.24b
	2-keto-D-gluconate	-	-	-	5.21a*	8.25a	6.21a	6.91a	6.67a
	myo-inositol	-	-	-	9.05a*	8.15ab	7.74b	7.69b	6.06c
	raffinose	-	-	-	0.57d*	2.00a	1.87a	1.56 b	1.00c
	ribonic acid	-	-	-	0.22c*	0.26bc	0.25bc	0.42a	0.34ab
	sorbitol	-	-	-	0.00d*	0.00d	0.53b	1.06 a	0.32c
	stachyose	-	-	-	0.20d*	2.06bc	3.63a	2.54b	1.73c
	sucrose	-	-	-	5.82d*	8.59c	13.51a	11.78b	8.51c
	Amino acids	-	-	-	27.37a*	26.85a	21.76b	19.18b	12.84c
	alanine	-	-	-	8.51a*	9.04a	4.99b	3.29c	1.92d
	asparagine	-	-	-	0.91b*	0.53c	1.28a	1.47a	1.28a
	GABA	-	-	-	0.39a*	0.25b	0.19cd	0.23bc	0.17d
	glutamate	-	-	-	1.97a*	0.94b	0.73c	0.77c	0.54d
	glutamine	-	-	-	5.58a*	5.59a	3.13b	2.88b	1.52c
	glycine	-	-	-	0.08b*	0.08ab	0.12a	0.10ab	0.07b
	hydroxyproline	-	-	-	2.60a*	1.76bc	2.95a	2.46ab	1.68c
	isoleucine	-	-	-	0.47b*	0.65a	0.64a	0.45b	0.33b
	leucine	-	-	-	0.72b*	0.69b	1.04a	1.13a	0.80b
	phenylalanine	-	-	-	0.76a*	0.36b	0.20c	0.15cd	0.10d
	proline	-	-	-	0.27c*	0.40a	0.40a	0.33b	0.26c
	serine	-	-	-	3.78a*	4.18a	4.03a	4.02a	2.88b
	threonine	-	-	-	1.35a*	1.57a	1.47a	1.60a	1.08b
	tryptophan	-	-	-	0.00c*	0.39a	0.20b	0.00c	0.00c
	valine	-	-	-	0.33c*	0.44a	0.39b	0.31c	0.22d
	Organic acids	-	-	-	28.09b*	46.66a	34.19b	33.63b	27.31b
	citrate	-	-	-	5.83b*	14.77a	10.10ab	9.99ab	8.40b
	lactate	-	-	-	0.52c*	1.38a	0.75b	0.31d	0.67bc
	malate	-	-	-	16.29b*	24.13a	16.60b	16.48b	13.15c
	oxalate	-	-	-	0.38a*	0.28b	0.15c	0.12c	0.11c
	rythronic acid	-	-	-	0.26b*	0.46a	0.44b	0.46a	0.37b
	succinate	-	-	-	4.82bc*	5.63ab	6.15a	6.27a	4.61c
	Remaining compound (phosphate)	-	-	-	22.95a*	19.98b	11.92c	10.25c	7.01d
Hypocotyl	Total polar metabolites	-	-	-	-	298.09a	215.61b	256.03ab	232.46b
	Soluble carbohydrates	-	-	-	-	166.03a	134.12b	167.51a	142.69ab
	fructose	-	-	-	-	54.50ab	44.08c	58.55a	46.96bc
	fructose-6-phosphate	-	-	-	-	0.45c	0.94b	1.26a	0.97ab
	galactinol	-	-	-	-	0.09ab	0.12a	0.10ab	0.08b
	galactose	-	-	-	-	15.95a	10.16b	8.58b	10.80b
	glucose	-	-	-	-	63.33ab	50.89b	70.74a	58.25ab
	glucose-6-phosphate	-	-	-	-	0.67c	1.21b	1.63a	1.07b
	2-keto-D-gluconate	-	-	-	-	13.68a	9.53b	9.91b	11.28ab
	myo-inositol	-	-	-	-	14.52a	8.65b	9.36b	7.69b
	raffinose	-	-	-	-	0.95b	1.49a	1.54a	1.08b
	ribonic acid	-	-	-	-	0.25a	0.10b	0.16b	0.11b
	sorbitol	-	-	-	-	0.00b	0.16a	0.00b	0.00b
	stachyose	-	-	-	-	0.56c	1.16a	0.76bc	0.95ab
	sucrose	-	-	-	-	1.10d	5.79a	4.92b	3.46c
	Amino acids	-	-	-	-	45.87a	27.77b	32.37b	35.87b
	alanine	-	-	-	-	10.66a	3.85b	4.24b	5.70b
	asparagine	-	-	-	-	1.42a	0.86b	0.90b	0.80b
	β-alanine	-	-	-	-	0.16b	0.18ab	0.18ab	0.21a
	GABA	-	-	-	-	0.98a	0.22c	0.26bc	0.34b
	glutamate	-	-	-	-	0.79a	0.39b	0.32b	0.22b
	glutamine	-	-	-	-	10.51a	3.41b	2.96b	5.37b
	glycine	-	-	-	-	0.08a	0.17a	0.15a	0.14a
	hydroxyproline	-	-	-	-	5.39b	5.62b	7.80a	7.17ab
	isoleucine	-	-	-	-	1.84a	1.57a	1.86a	1.78a
	leucine	-	-	-	-	1.17a	1.48a	1.31a	1.31a
	phenylalanine	-	-	-	-	2.09a	1.39b	1.49ab	1.45ab
	proline	-	-	-	-	0.41a	0.79a	0.77a	0.66a
	serine	-	-	-	-	6.59a	4.95b	6.30a	6.55a
	threonine	-	-	-	-	2.40a	1.43a	1.92ab	2.14a
	tryptophan	-	-	-	-	0.17b	0.16b	0.29a	0.26a
	valine	-	-	-	-	1.19c	1.31bc	1.62ab	1.74a
	Organic acids	-	-	-	-	49.76a	33.84b	37.33b	37.91b
	citrate	-	-	-	-	20.49a	11.59b	10.85b	13.10b
	lactate	-	-	-	-	0.37a	0.13b	0.17b	0.12b
	malate	-	-	-	-	20.42a	15.71b	18.78ab	16.97ab
	oxalate	-	-	-	-	0.55a	0.12b	0.15b	0.11b
	rythronic acid	-	-	-	-	0.60a	0.19b	0.23b	0.19b
	succinate	-	-	-	-	7.34a	6.11b	7.16ab	7.43a
	Remaining compound (phosphate)	-	-	-	-	36.43a	19.88b	18.81b	15.98b
	* - total content for both root and hypocotyl

## Sheet: Supp Tab_S4_T.a.
Table S4. The concentration of polar metabolites in the endosperm, embryo, roots and coleoptile of wheat (Triticum aestivum L. cv. Forkida) during grain gemination and seedling development. Means (n=3-5) in mg/g DW. Statistically significant differences (P<0.05) are indicated by different letters after one-way ANOVA and Tukey’s post hoc test.
		Germination (days)
		0	1	2	3	4	5	6	7
Organ	Metabolite	mg/g DW
Endosperm	Total polar metabolites	23.20e	21.02e	29.83e	39.94d	55.90c	81.50b	103.27a	111.67a
	Soluble carbohydrates	18.02f	15.83f	23.43ef	31.60e	44.09d	66.68c	88.23b	98.51a
	fructose	0.30d	0.24de	0.17e	0.23de	0.74ab	0.80a	0.63bc	0.57c
	fructose-6-phosphate	0.00c	0.00c	0.02c	0.03b	0.04b	0.06a	0.07a	0.07a
	glucose	0.40e	0.87e	1.46e	3.86e	10.97d	20.90c	33.59b	43.50a
	glucose-6-phosphate	0.00c	0.00c	0.02c	0.05b	0.05b	0.06a	0.07a	0.07a
	1-kestose	6.29a	5.25bc	5.67b	4.71c	2.13a	1.26e	1.09e	1.18e
	2-keto-D-gluconate	0.00e	0.03de	0.07bcd	0.08abc	0.12a	0.09ab	0.08abc	0.04cde
	maltose	3.76ef	2.14f	6.61de	8.87d	16.62c	27.40b	31.96a	29.49ab
	myo-inositol	0.03f	0.09ef	0.09ef	0.16e	0.39c	0.69c	1.06b	1.26a
	raffinose	1.18a	0.27b	0.00c	0.00c	0.00c	0.00c	0.00c	0.00c
	ribonic acid	0.00b	0.00b	0.00b	0.01b	0.02a	0.03a	0.03a	0.02a
	sorbitol	0.11a	0.00c	0.01c	0.00c	0.01c	0.01c	0.01c	0.02b
	sucrose	5.96f	6.93f	9.30e	13.59d	12.98d	15.37c	19.62b	22.27a
	Amino acids	0.83f	1.52e	2.45d	3.81c	6.05b	7.65a	7.46a	5.84b
	alanine	0.04e	0.11d	0.16c	0.22b	0.28a	0.32a	0.31a	0.29a
	asparagine	0.13e	0.13e	0.12e	0.16e	0.31d	0.52c	0.62b	0.76a
	β-alanine	0.04a	0.00b	0.00b	0.00b	0.00b	0.00b	0.00b	0.00b
	GABA	0.02d	0.08b	0.06c	0.06c	0.03d	0.06c	0.06c	0.09a
	glutamate	0.12e	0.17d	0.21c	0.22bc	0.23ab	0.23a	0.23a	0.24a
	glutamine	0.07f	0.14f	0.29e	0.53d	0.74ab	0.83a	0.71bc	0.59cd
	glycine	0.05e	0.14a	0.10cd	0.13ab	0.08d	0.09cd	0.11bc	0.09d
	hydroxyproline	0.19e	0.22e	0.25e	0.35d	0.53b	0.62a	0.55ab	0.44c
	isoleucine	0.01f	0.03f	0.09e	0.19d	0.39d	0.53a	0.56a	0.48c
	leucine	0.04de	0.00f	0.02ef	0.06d	0.09c	0.14b	0.17a	0.14b
	lysine	0.00d	0.00d	0.05cd	0.11c	0.23b	0.35a	0.28ab	0.00d
	phenylalanine	0.01e	0.03e	0.10d	0.26c	0.57b	0.73a	0.72a	0.60b
	proline	0.05g	0.13g	0.30f	0.60e	0.98c	1.20a	1.09b	0.80d
	serine	0.03f	0.09f	0.18e	0.37d	0.59b	0.70a	0.62b	0.43c
	threonine	0.01f	0.05e	0.10d	0.18c	0.29b	0.37a	0.37a	0.31b
	tyrosine	0.00d	0.02d	0.06cd	0.14bc	0.22b	0.33a	0.35a	0.00d
	valine	0.02f	0.04f	0.12e	0.25d	0.48c	0.66a	0.70a	0.58b
	Organic acids	2.00ab	1.75bc	1.52c	1.55c	1.74bc	1.91ab	2.10a	2.14a
	acetate	0.00e	0.39a	0.28bc	0.33ab	0.24c	0.15d	0.12d	0.04e
	citrate	0.08g	0.19	0.36e	0.71d	1.07c	1.23b	1.34a	1.42a
	fumarate	0.00e	0.12a	0.08b	0.04c	0.02d	0.02d	0.02d	0.01e
	lactate	0.06c	0.06c	0.15b	0.10bc	0.13bc	0.15b	0.26a	0.28a
	malate	1.29a	0.91b	0.54c	0.27d	0.11de	0.11de	0.10e	0.13de
	oxalate	0.47a	0.00b	0.00b	0.00b	0.00b	0.00b	0.00b	0.00b
	propanoic acid	0.00a	0.00a	0.02a	0.00a	0.00a	0.02a	0.02a	0.02a
	succinate	0.09d	0.09d	0.09d	0.11c	0.17b	0.24a	0.25a	0.24a
	Remaining compounds	2.35cd	2.07d	2.65cd	2.98c	4.02b	5.21a	5.48a	5.18a
	phosphate	2.35de	2.07e	2.64cd	2.97c	4.00b	5.20a	5.30a	5.13a
	urea	0.00b	0.00b	0.01b	0.02b	0.02b	0.01b	0.18a	0.05b
Embryo	Total polar metabolites	52.91c	173.12a	126.95b	-	-	-	-	-
	Soluble carbohydrates	46.22c	139.86a	65.16b	-	-	-	-	-
	fructose	0.24c	3.07b	4.14a	-	-	-	-	-
	fructose-6-phosphate	0.03c	0.20b	5.49a	-	-	-	-	-
	galactinol	0.78a	0.00b	0.00b	-	-	-	-	-
	glucose	0.26c	6.32a	5.18b	-	-	-	-	-
	glucose-6-phosphate	0.11c	0.55b	8.20a	-	-	-	-	-
	1-kestose	4.47c	49.60a	13.82b	-	-	-	-	-
	2-keto-D-gluconate	0.00c	0.27b	4.70a	-	-	-	-	-
	maltose	7.82a	0.44b	0.94b	-	-	-	-	-
	myo-inositol	0.25b	2.84a	0.32b	-	-	-	-	-
	raffinose	7.11a	1.32b	0.20c	-	-	-	-	-
	ribonic acid	0.02b	0.12b	0.23a	-	-	-	-	-
	sorbitol	0.15b	0.36a	0.03c	-	-	-	-	-
	sucrose	24.99b	74.76a	23.70b	-	-	-	-	-
	Amino acids	1.52c	18.33b	25.43a	-	-	-	-	-
	alanine	0.09c	2.48b	3.80a	-	-	-	-	-
	asparagine	0.33b	0.50a	0.53a	-	-	-	-	-
	β-alanine	0.03a	0.00b	0.00b	-	-	-	-	-
	GABA	0.07c	0.92a	0.47b	-	-	-	-	-
	glutamate	0.29c	2.86b	3.40a	-	-	-	-	-
	glutamine	0.16c	1.85b	6.15a	-	-	-	-	-
	glycine	0.06c	0.84a	0.39b	-	-	-	-	-
	hydroxyproline	0.21b	1.08a	0.00c	-	-	-	-	-
	isoleucine	0.01c	0.17b	1.03a	-	-	-	-	-
	leucine	0.10a	0.00b	0.15a	-	-	-	-	-
	lysine	0.00b	0.30a	0.00b	-	-	-	-	-
	phenylalanine	0.00c	0.17b	0.25a	-	-	-	-	-
	proline	0.07c	4.93a	2.81b	-	-	-	-	-
	serine	0.06c	1.25c	2.48a	-	-	-	-	-
	threonine	0.03c	0.58b	1.00a	-	-	-	-	-
	tyrosine	0.00b	0.00b	0.18a	-	-	-	-	-
	valine	0.03c	0.39b	1.11a	-	-	-	-	-
	Organic acids	2.23c	9.61b	22.25a	-	-	-	-	-
	acetate	0.00c	1.51a	0.76b	-	-	-	-	-
	citrate	0.59c	2.97b	9.74a	-	-	-	-	-
	fumarate	0.00c	0.40b	0.88a	-	-	-	-	-
	lactate	0.12b	0.70a	0.70a	-	-	-	-	-
	malate	0.91c	3.33b	9.55a	-	-	-	-	-
	oxalate	0.48a	0.00b	0.05b	-	-	-	-	-
	propanoic acid	0.00b	0.00b	0.13a	-	-	-	-	-
	succinate	0.13c	0.58a	0.42b	-	-	-	-	-
	Remaining compounds	2.90c	5.44b	14.11a	-	-	-	-	-
	phosphate	2.90c	5.44b	13.96a	-	-	-	-	-
	urea	0.00b	0.00b	0.15a	-	-	-	-	-
Roots	Total polar metabolites	-	-	-	170.19a	96.33c	92.62c	109.54b	111.30b
	Soluble carbohydrates	-	-	-	103.92a	26.60d	23.76d	44.74c	52.71b
	fructose	-	-	-	12.68a	3.19d	3.17d	4.59c	5.42b
	fructose-6-phosphate	-	-	-	1.27a	0.33b	0.30b	0.13c	0.12c
	galactinol	-	-	-	0.27a	0.00b	0.00b	0.00b	0.00b
	glucose	-	-	-	15.67b	7.23c	7.64c	16.49b	19.98a
	glucose-6-phosphate	-	-	-	4.79a	0.17c	0.15c	0.31b	0.27b
	1-kestose	-	-	-	28.43a	3.05b	2.16bc	2.23bc	2.09c
	maltose	-	-	-	1.29c	1.83c	2.78b	7.58a	6.80a
	myo-inositol	-	-	-	0.56a	0.21bc	0.18c	0.21bc	0.22b
	ribonic acid	-	-	-	0.00c	0.36b	0.52a	0.53a	0.51a
	sorbitol	-	-	-	0.00b	0.02a	0.02a	0.02a	0.03a
	sucrose	-	-	-	38.96a	10.16d	6.77e	12.60c	17.18b
	Amino acids	-	-	-	38.01a	24.41c	24.09c	27.28b	22.63c
	alanine	-	-	-	6.65a	1.06b	0.77bc	0.53c	0.53c
	asparagine	-	-	-	0.65d	4.92c	5.84c	11.21a	9.28b
	β-alanine	-	-	-	0.18a	0.00b	0.00b	0.00b	0.00b
	GABA	-	-	-	0.26a	0.07c	0.09bc	0.23ab	0.35a
	glutamate	-	-	-	4.38a	0.86b	0.63bc	0.50cd	0.37d
	glutamine	-	-	-	5.41c	8.90a	7.82b	5.48c	3.99d
	glycine	-	-	-	0.28c	0.99b	1.20b	1.96a	2.05a
	hydroxyproline	-	-	-	3.57a	1.63b	1.48c	1.32d	1.06e
	isoleucine	-	-	-	1.16b	1.44a	1.56a	1.35ab	1.15b
	leucine	-	-	-	1.22a	0.23b	0.26b	0.23b	0.25b
	lysine	-	-	-	0.00b	0.00b	0.00b	0.33a	0.28a
	phenylalanine	-	-	-	0.00c	0.31b	0.37a	0.39a	0.30b
	proline	-	-	-	8.36a	0.84b	0.93b	0.57bc	0.40c
	serine	-	-	-	3.21a	1.66b	1.30bc	1.21bc	1.01c
	threonine	-	-	-	1.43a	1.01b	1.01b	0.89bc	0.81c
	tyrosine	-	-	-	0.00b	0.22a	0.24a	0.18a	0.00b
	valine	-	-	-	1.24a	1.34a	1.36a	1.43a	1.34a
	Organic acids	-	-	-	19.11c	31.21a	32.54a	26.92b	25.52b
	acetate	-	-	-	0.00d	0.43a	0.40ab	0.31bc	0.23c
	citrate	-	-	-	6.87c	11.39a	12.10a	8.05b	6.45c
	fumarate	-	-	-	0.00d	0.68b	1.30a	0.20c	0.17c
	2-keto-D-glutarate	-	-	-	0.00b	7.01a	6.98a	6.41a	6.13a
	lactate	-	-	-	0.30d	0.79c	1.24b	1.28b	2.75a
	malate	-	-	-	10.10a	10.25a	9.62ab	10.10a	9.11b
	oxalate	-	-	-	1.18a	0.04b	0.04b	0.02b	0.02b
	propanoic acid	-	-	-	0.00d	0.33b	0.55a	0.22c	0.21c
	succinate	-	-	-	0.67a	0.30c	0.31c	0.33c	0.44b
	Remaining compounds	-	-	-	9.15c	13.05a	11.46b	10.07c	9.92c
	phosphate	-	-	-	9.15c	12.81a	11.15b	9.73c	9.02c
	urea	-	-	-	0.00d	0.24c	0.31b	0.34b	0.89a
Shoot	Total polar metabolites	-	-	-	145.93a	143.50a	138.14a	114.09b	129.82ab
	Soluble carbohydrates	-	-	-	95.64a	51.81b	47.52c	48.28c	57.58b
	fructose	-	-	-	4.82c	8.80b	8.12b	11.93a	7.83b
	fructose-6-phosphate	-	-	-	1.72a	0.31d	0.62c	1.15b	1.17b
	galactinol	-	-	-	0.21a	0.00b	0.00b	0.00b	0.00b
	glucose	-	-	-	7.12d	20.17c	21.01c	25.40b	38.95a
	glucose-6-phosphate	-	-	-	3.62a	0.35c	0.38c	0.34c	0.50b
	1-kestose	-	-	-	26.98a	4.90b	3.02c	2.03c	2.25c
	maltose	-	-	-	1.23a	1.21a	1.22a	1.24a	0.71b
	myo-inositol	-	-	-	0.87c	1.42a	1.39a	0.99bc	1.11b
	ribonic acid	-	-	-	0.00c	0.49a	0.47a	0.45a	0.40b
	sorbitol	-	-	-	0.00b	0.00b	0.00b	0.06a	0.07a
	sucrose	-	-	-	49.07a	14.17b	11.29b	4.61c	4.52c
	Amino acids	-	-	-	29.87a	14.14c	15.04c	14.95c	25.39b
	alanine	-	-	-	4.26a	0.83b	0.77bc	0.51cd	0.40d
	asparagine	-	-	-	0.24e	2.79d	4.78c	5.31b	15.73a
	β-alanine	-	-	-	0.17a	0.00b	0.00b	0.00b	0.00b
	GABA	-	-	-	0.47b	0.34bc	0.20cd	0.13d	0.74a
	glutamate	-	-	-	4.69a	1.90b	1.41c	1.00d	0.53e
	glutamine	-	-	-	2.79a	2.35bc	2.12c	2.45b	1.54d
	glycine	-	-	-	0.22d	0.83cd	1.31bc	1.55b	3.76a
	hydroxyproline	-	-	-	2.39a	1.22b	1.06bc	0.82c	0.08d
	isoleucine	-	-	-	0.59ab	0.55b	0.61ab	0.71a	0.60ab
	leucine	-	-	-	0.76a	0.06b	0.08b	0.07b	0.11b
	proline	-	-	-	8.86a	0.55b	0.49b	0.31b	0.19b
	serine	-	-	-	2.47a	2.19a	1.53b	1.26bc	1.01c
	threonine	-	-	-	1.21a	0.47c	0.58bc	0.71b	0.61bc
	valine	-	-	-	0.75a	0.05c	0.09bc	0.10b	0.10b
	Organic acids	-	-	-	12.83c	63.32a	59.94a	36.47b	31.32b
	acetate	-	-	-	0.00e	0.83a	0.52b	0.17d	0.25c
	citrate	-	-	-	5.05d	37.31a	35.88a	20.81b	13.93c
	fumarate	-	-	-	0.00d	0.98a	0.57b	0.39c	0.32c
	2-keto-D-glutarate	-	-	-	0.00c	18.10a	17.65a	11.49b	13.85b
	lactate	-	-	-	0.45a	0.23b	0.25b	0.24b	0.32b
	malate	-	-	-	5.63a	4.25b	3.12c	1.75d	1.81d
	oxalate	-	-	-	1.10a	0.17b	0.14b	0.10b	0.08b
	propanoic acid	-	-	-	0.00c	0.71b	1.29a	1.21a	0.42b
	succinate	-	-	-	0.61b	0.76a	0.52b	0.30c	0.34c
	Remaining compounds	-	-	-	7.57b	14.23a	15.65a	14.40a	15.53a
	phosphate	-	-	-	7.57b	14.16a	15.60a	14.36a	15.44a
	urea	-	-	-	0.00d	0.07b	0.04c	0.04c	0.09a
